# Supplementary material
Source: PubMed Central journal article supplement (PMC4449279)

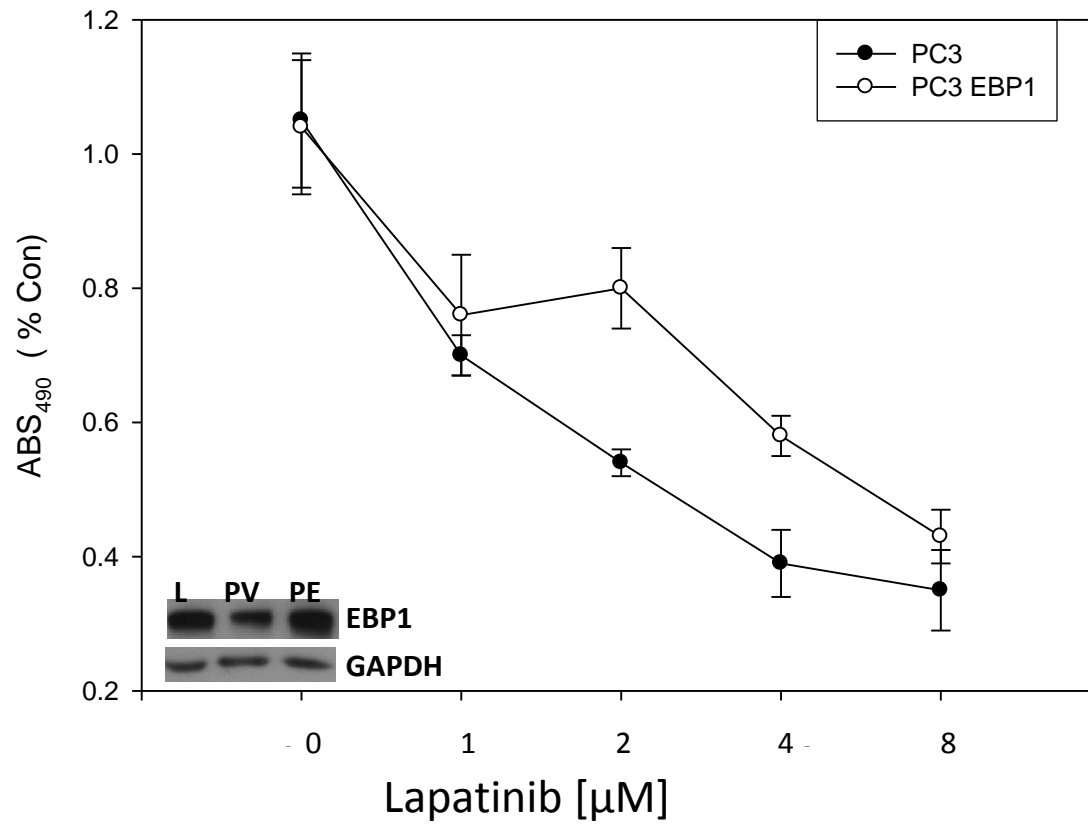

Supplement: NIHMS681916-supplement-11010_2015_2409_MOESM1_ESM.pdf [file NIHMS681916-supplement-11010_2015_2409_MOESM1_ESM.pdf]

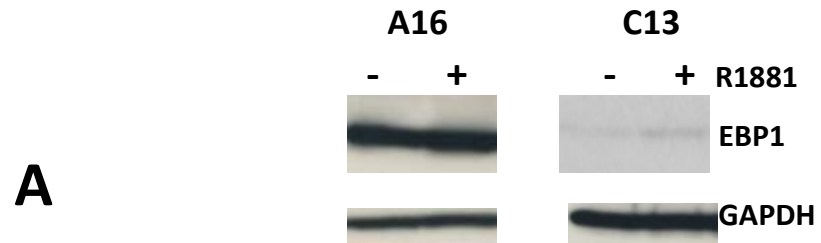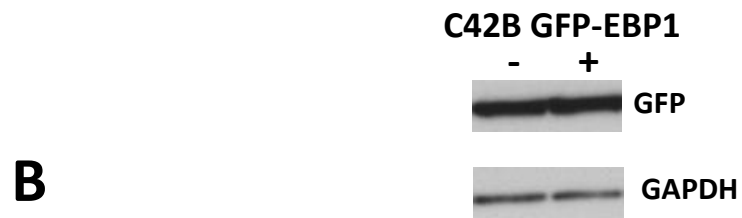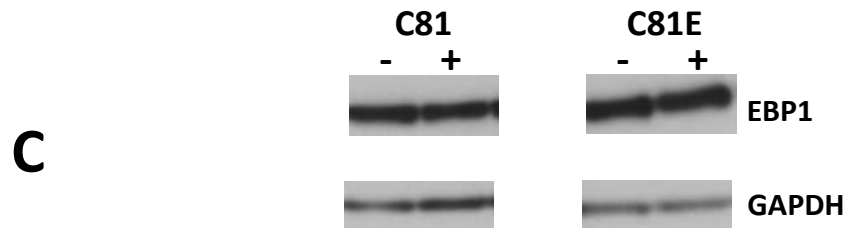

Supplement: NIHMS681916-supplement-11010_2015_2409_MOESM2_ESM.pdf [file NIHMS681916-supplement-11010_2015_2409_MOESM2_ESM.pdf]

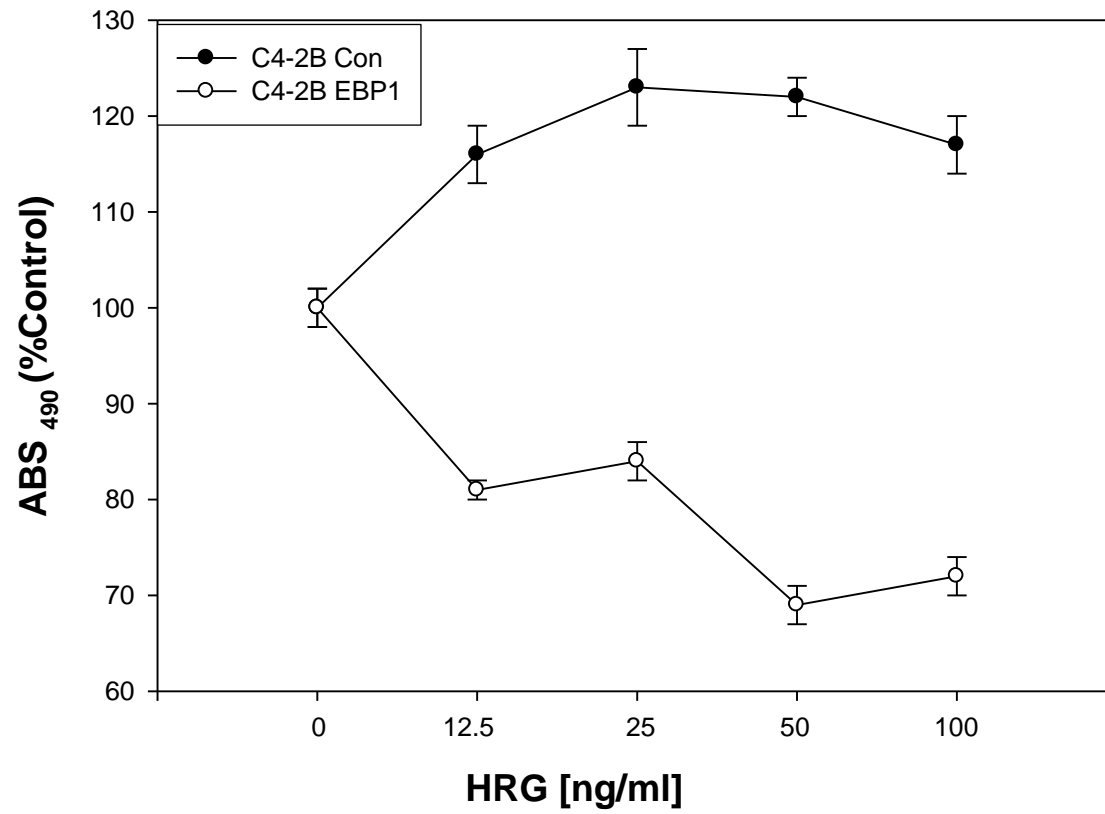

Supplement: NIHMS681916-supplement-11010_2015_2409_MOESM3_ESM.pdf [file NIHMS681916-supplement-11010_2015_2409_MOESM3_ESM.pdf]

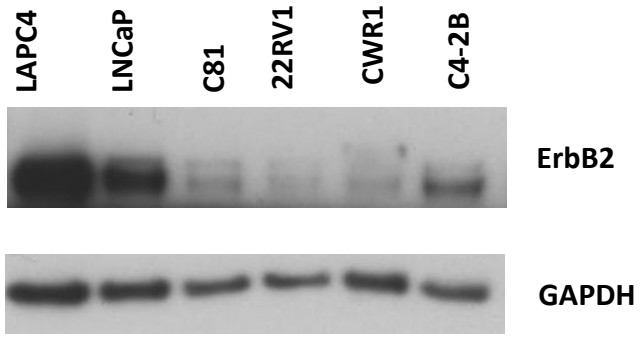

Supplement: NIHMS681916-supplement-11010_2015_2409_MOESM4_ESM.pdf [file NIHMS681916-supplement-11010_2015_2409_MOESM4_ESM.pdf]
